# Supplementary material for: Ex vivo expansion potential of murine hematopoietic stem cells is a rare property only partially predicted by phenotype
Source: eLife. 2024 Mar 6;12:RP91826. doi: 10.7554/eLife.91826 (PMC10942641; doi:10.7554/eLife.91826)
Supplement: Figure 1—figure supplement 1—source data 1. [file elife-91826-fig1-figsupp1-data1.xlsx]

## Sheet: Fig 1 FS 1A
	Raw data for Figure 1 – figure supplement 1A
	Donor chimerism in PB B and T cells 16 weeks post-transplantation
	(% donor chimerism)
		Lymphoid cells			Myeloid cells
		EPCRhighCD41-	EPCRhighCD41+		EPCRhighCD41-	EPCRhighCD41+
		93.974	74.512		4.866	22.34
		95.984	76.642		3.068	21.936
		91.311	81.793		7.208	15.932
		88.203	78.193		9.793	18.871
		83.685	16.347		14.18	78.784
