# Supplementary material for: Ex vivo expansion potential of murine hematopoietic stem cells is a rare property only partially predicted by phenotype
Source: eLife. 2024 Mar 6;12:RP91826. doi: 10.7554/eLife.91826 (PMC10942641; doi:10.7554/eLife.91826)
Supplement: Figure 1—figure supplement 1—source data 2. [file elife-91826-fig1-figsupp1-data2.xlsx]

## Sheet: Fig 1 FS 1C
	Raw data for Figure 1 – figure supplement 1C
	Cellularity of whole culture expanded ex vivo from EPCR(low) or EPCR(high) SLAM LSKs
	(# of cells)
		8 days of expansion			25 days of expansion
		EPCRlow	EPCRhigh		EPCRlow	EPCRhigh
		2319	23		4225000	39900
		1460	164		11382	608000
		453	37		18207	31920
		479	107		17073	12600000
		1004	206		13780000	5796000
		120	74		18207	3556000
		536	61		30660	36880
		766	492		3809000	5004000
		1255	130		4557	432000
		4134	136		6825	47880
			98			1800000
			127			128730
			116			2276000
			278			48930
						9108000
