# Supplementary material for: Ex vivo expansion potential of murine hematopoietic stem cells is a rare property only partially predicted by phenotype
Source: eLife. 2024 Mar 6;12:RP91826. doi: 10.7554/eLife.91826 (PMC10942641; doi:10.7554/eLife.91826)
Supplement: Figure 1—source data 1. [file elife-91826-fig1-data1.xlsx]

## Sheet: Fig 1C
	Raw data for Figure 1C
	Donor chimerism in PB 4 and 16 weeks post-transplantation
	(% donor chimerism)
		T cells
			EPCRhigh					EPCR-					EPCRhighCD41-					EPCRhighCD41+
		4 weeks	0	0.014	0	0	0	0	0	0	0	0	0	0	0.004	0	0	0	0	0	0	0
		16 weeks	0.215	50.62	60.006	4.02	35.737	0.717	3.084	2.477	0.17	0.479	30.288	6.163	53.25	43.925	54.705	26.514	34.059	17.259	17.189	0.636
		B cells
			EPCRhigh					EPCR-					EPCRhighCD41-					EPCRhighCD41+
		4 weeks	0.002	1.744	0.004	0.168	0.048	1.266	0.137	0.293	0.367	0.533	0.057	0.218	1.395	0.197	0	0.291	1.019	0.017	0.164	0
		16 weeks	0.196	26.094	47.622	2.632	24.318	0.394	1.199	1.544	0.51	0.99	19.901	11.065	24.05	44.244	51.639	26.142	26.966	15.329	14.456	0.244
		Myeloid cells
			EPCRhigh					EPCR-					EPCRhighCD41-					EPCRhighCD41+
		4 weeks	6.062	54.762	28.533	12.181	13.946	8.681	21.656	13.266	8.436	6.169	17.372	1.065	40.898	27.167	9.84	32.56	10.154	29.811	36.947	2.727
		16 weeks	0.044	70.161	48.947	24.941	73.944	0.141	2.157	1.562	0	0.564	19.709	3.994	29.235	73.527	92.068	87.052	74.912	33.893	53.669	25.03
