# Supplementary material for: Ex vivo expansion potential of murine hematopoietic stem cells is a rare property only partially predicted by phenotype
Source: eLife. 2024 Mar 6;12:RP91826. doi: 10.7554/eLife.91826 (PMC10942641; doi:10.7554/eLife.91826)
Supplement: Figure 1—source data 2. [file elife-91826-fig1-data2.xlsx]

## Sheet: Fig 1D
	Raw data for Figure 1D
	Donor chimerism in BM EPCR+ SLAM LSKs 16 weeks post-transplantation
	(% donor chimerism)
	EPCRhigh	EPCR-	EPCRhighCD41-	EPCRhighCD41+
	0.3676	0	27.483	53.0253
	74.6777	0	68.8889	20.1671
	80	0	27.9133	17.6471
	84.1972	0.5714	49.7645	90.411
	42.6168	0.3165	85.0909	81.8851
