# Supplementary material for: Ex vivo expansion potential of murine hematopoietic stem cells is a rare property only partially predicted by phenotype
Source: eLife. 2024 Mar 6;12:RP91826. doi: 10.7554/eLife.91826 (PMC10942641; doi:10.7554/eLife.91826)
Supplement: Figure 1—source data 3. [file elife-91826-fig1-data3.xlsx]

## Sheet: Fig 1E
	Raw data for Figure 1E
	Correlation between EPCR expression level and animal survival
	EPCR expression level	Days of survival
	16723.2	92
	15559.4	Survived
	15345.7	Survived
	13285.7	84
	12517.4	76
	12123.5	Survived
	10116.6	33
	9343.62	34
	8349.12	Survived
	8041.02	Survived
	6696.3	29
	6258.72	Survived
	5983.38	29
	5682.3	12
	4915.56	Survived
	4665.96	34
	4658.94	83
	3928.86	26
	3546.66	14
	3539.64	26
	3228.42	7
	1698.84	29
	Equation of linear regression
	y = 41.87*x + 4854
