# Supplementary material for: Ex vivo expansion potential of murine hematopoietic stem cells is a rare property only partially predicted by phenotype
Source: eLife. 2024 Mar 6;12:RP91826. doi: 10.7554/eLife.91826 (PMC10942641; doi:10.7554/eLife.91826)
Supplement: Figure 1—source data 4. [file elife-91826-fig1-data4.xlsx]

## Sheet: Fig 1F
	Raw data for Figure 1F
	Donor chimerism in PB myeloid cells 16 weeks post-transplantation
	(% donor chimerism)
	EPCRlow	EPCRhigh
	97.275	99.586
	97.995	99.618
		98.556
		97.465
		99.044
