# Supplementary material for: Ex vivo expansion potential of murine hematopoietic stem cells is a rare property only partially predicted by phenotype
Source: eLife. 2024 Mar 6;12:RP91826. doi: 10.7554/eLife.91826 (PMC10942641; doi:10.7554/eLife.91826)
Supplement: Figure 2—figure supplement 1—source data 1. [file elife-91826-fig2-figsupp1-data1.xlsx]

## Sheet: Fig 2 FS 1A
	Raw data for Figure 2 – figure supplement 1A
	Cellularity of whole culture expanded ex vivo for 2 or 3 weeks
	(x105 cells)
	2 weeks	3 weeks
	2.608	164.16
	3.904	162.72
	2.08	241.92
	3.984	167.76
	3.904	104.4
	2.608	104.4
	4.977	111.6
	6.147	118.8
	8.685	113.76
	7.713	124.56
	9.36	97.2
	8.739	123.84
