# Supplementary material for: Ex vivo expansion potential of murine hematopoietic stem cells is a rare property only partially predicted by phenotype
Source: eLife. 2024 Mar 6;12:RP91826. doi: 10.7554/eLife.91826 (PMC10942641; doi:10.7554/eLife.91826)
Supplement: Figure 2—figure supplement 1—source data 2. [file elife-91826-fig2-figsupp1-data2.xlsx]

## Sheet: Fig 2 FS 1B
	Raw data for Figure 2 – figure supplement 1B
	Frequency of cells with different surface marker expression patterns
	(% of viable cells)
		2 weeks												3 weeks
	Lin-FcerR1a-	90.6	89.3	93	92.7	92.2	93.6	79.9	88.4	87.5	85.6	82.8	91.3	74.9	80.5	84	84	74.6	81.5	79.8	77.7	83.6	72.7	72.4	80.1
	cKit+	88.1	85.8	90.6	89.7	89.1	89.3	75.1	83.5	84.6	82.2	80	88.4	51.6	70	79.1	79.8	69.1	76.1	75.9	74.4	80.7	69.2	68.4	77.1
	Sca1+	22.6	22.9	26.4	25.2	9.68	20.4	16.8	10.7	22.8	12.5	8.59	12.7	6.83	5.89	3.14	6.57	3.19	9.09	15.2	6.82	11	11.5	5.08	6.87
	CD150+	52.4	71.1	65.1	73.8	40.8	51.9	35.8	44.5	47.9	37.9	36.2	52.4	16	22.7	22.4	28.8	26.7	35.4	21.4	17.6	27.1	20.3	19.3	24.8
	CD48-	1.47	0.98	1.47	1.46	0.63	2.08	0.4	1.09	0.65	0.87	1.3	1.05	25.9	6.45	3.49	2.36	1.85	1.71	1.89	1.45	0.93	1.19	1.27	1.7
	EPCR+	13.9	10.2	14.9	13.7	5.05	11.3	7.01	7.07	6.72	7.19	2.86	9.63	3.6	2.23	1.14	1.93	1.55	4.37	2.42	1.43	6.47	1.98	6.33	5.85
