# Supplementary material for: Ex vivo expansion potential of murine hematopoietic stem cells is a rare property only partially predicted by phenotype
Source: eLife. 2024 Mar 6;12:RP91826. doi: 10.7554/eLife.91826 (PMC10942641; doi:10.7554/eLife.91826)
Supplement: Figure 2—source data 1. [file elife-91826-fig2-data1.xlsx]

## Sheet: Fig 2A
	Raw data for Figure 2A
	Frequency and fold change of phenotypic cHSCs expanded ex vivo
	cHSC frequency			cHSC fold change
	(% of viable cells)
	2 weeks	3 weeks		2 weeks	3 weeks
	1.2927	0.3878		67.43	1273.27
	0.7474	0.1464		58.35	476.33
	0.9895	0.0478		41.16	231.23
	1.0689	0.0623		85.17	208.89
	0.4609	0.0515		35.99	107.46
	1.0349	0.0927		53.98	193.46
	0.2582	0.0972		25.7	216.86
	0.561	0.1037		68.97	246.29
	0.2856	0.0454		49.6	103.14
	0.2775	0.0414		42.81	102.94
	0.3852	0.1286		72.11	249.8
	0.2852	0.0348		49.85	86.12
