# Supplementary material for: Ex vivo expansion potential of murine hematopoietic stem cells is a rare property only partially predicted by phenotype
Source: eLife. 2024 Mar 6;12:RP91826. doi: 10.7554/eLife.91826 (PMC10942641; doi:10.7554/eLife.91826)
Supplement: Figure 3—figure supplement 1—source data 1. [file elife-91826-fig3-figsupp1-data1.xlsx]

## Sheet: Fig 3 FS 1A
	Raw data for Figure 3 – figure supplement 1A
	Donor chimerism in PB B cells over 24 weeks post-transplantation
	(% donor chimerism)
		EE50					EPCRhighCD48-/low					EPCRhighCD48+					EPCR-
	4 weks	71.972	74.614	72.232	76.37	77.374	41.169	40.107	31.078	26.422	21.006	59.309	66.111	36.587	66.072	59.955	1.587	1.569	1.139	0.96	0.718
	8 weeks	87.038	86.953	85.079	86.72	86.216	62.116	59.566	56.982	56.861	53.229	41.315	44.189	21.312	62.046	36.249	0.759	0.359	0.442	0.109	0.266
	12 weeks	87.886	89.161	88.101	88.077	90.391	55.97	59.767	72.209	57.12	64.849	30.353	29.246	13.976	52.372	24.291	0.45	0.202	0.192	0.053	0.149
	16 weeks	84.738	89.02	90.976	86.812	93.256	45.101	54.583	75.114	54.236	65.653	21.926	21.36	8.969	39.302	17.371	0.248	0.134	0.131	0.026	0.094
	20 weeks	89.269	93.906	94.343	87.908	95.578	49.544	53.039	79.395	49.365	64.986	14.962	15.575	6.513	29.526	12.309	0.207	0.093	0.059	0.019	0.044
	24 weeks	87.284	93.695	95.521	87.789	96.517	50.242	44.308	80.613	44.911	65.72	8.855	11.173	4.819	18.146	6.778	0.104	0.056	0.032	0.007	0.028
