# Supplementary material for: Ex vivo expansion potential of murine hematopoietic stem cells is a rare property only partially predicted by phenotype
Source: eLife. 2024 Mar 6;12:RP91826. doi: 10.7554/eLife.91826 (PMC10942641; doi:10.7554/eLife.91826)
Supplement: Figure 3—figure supplement 1—source data 2. [file elife-91826-fig3-figsupp1-data2.xlsx]

## Sheet: Fig 3 FS 1B
	Raw data for Figure 3 – figure supplement 1B
	Donor chimerism in PB T cells over 24 weeks post-transplantation
	(% donor chimerism)
		EE50					EPCRhighCD48-/low					EPCRhighCD48+					EPCR-
	4 weks	33.905	35.62	40.915	43.377	48.963	1.433	1.121	0.438	1.28	0.853	4.362	3.738	4.654	5.534	6.097	10.224	4.243	11.116	0.089	0.066
	8 weeks	69.353	74.15	74.082	76.769	81.248	54.933	53.697	47.902	53.89	47.47	61.707	54.391	53.248	58.257	55.656	9.676	7.029	7.644	0.037	0.029
	12 weeks	81.897	84.724	84.893	86.203	88.312	72.164	70.782	66.913	70.555	66.753	55.43	60.915	40.159	71.473	64.424	5.453	4.184	5.307	0.026	0.015
	16 weeks	82.414	84.337	88.037	89.464	91.675	76.105	76.13	75.294	75.72	73.287	45.336	58.414	26.786	73.753	61.241	3.445	2.969	3.489	0.028	0.009
	20 weeks	77.71	86.43	86.778	88.532	91.757	79.425	77.512	77.857	74.076	72.213	34.654	50.306	22.571	66.384	49.593	2.539	2.328	3.74	0.021	0.011
	24 weeks	83.745	89.416	91.05	92.223	92.261	82.101	81.236	83.97	80.76	81.094	29.838	48.939	19.882	60.199	38.01	1.827	2.17	3.109	0.025	0.004
