# Supplementary material for: Ex vivo expansion potential of murine hematopoietic stem cells is a rare property only partially predicted by phenotype
Source: eLife. 2024 Mar 6;12:RP91826. doi: 10.7554/eLife.91826 (PMC10942641; doi:10.7554/eLife.91826)
Supplement: Figure 3—source data 1. [file elife-91826-fig3-data1.xlsx]

## Sheet: Fig 3B
	Raw data for Figure 3B
	Donor chimerism in PB myeloid cells over 24 weeks post-transplantation
	(% donor chimerism)
		EE50					EPCRhighCD48-/low					EPCRhighCD48+					EPCR-
	4 weks	97.992	97.195	98.18	97.992	98.11	93.157	89.681	91.741	92.068	88.229	87.644	74.036	57.858	79.926	85	0.327	0.231	0.523	0.044	2.676
	8 weeks	98.75	98.92	98.134	98.207	98.387	94.659	90.474	96.651	92.539	93.269	32.082	54.139	8.704	77.271	41.511	0.016	0	0	0.01	0
	12 weeks	99.271	99.287	99.38	99.001	99.473	93.563	89.418	91.736	88.137	88.988	15.204	31.548	2.257	26.458	12.408	0.006	0.019	0.018	0.007	0
	16 weeks	96.524	96.078	98.943	98.844	99.788	92.466	89.344	88.692	87.06	86.043	12.718	31.038	1.355	12.321	3.194	0	0.026	0.062	0	0
	20 weeks	97.422	98.536	98.573	98.047	99.266	93.649	88.288	85.288	78.981	80.351	8.504	19.408	1.099	4.157	0.806	0	0.02	0.06	0	0
	24 weeks	98.627	96.684	98.99	98.591	99.25	95.519	87.956	87.527	81.413	82.146	5.963	17.702	0.987	4.679	0.529	0	0	0.06	0	0
