# Supplementary material for: Ex vivo expansion potential of murine hematopoietic stem cells is a rare property only partially predicted by phenotype
Source: eLife. 2024 Mar 6;12:RP91826. doi: 10.7554/eLife.91826 (PMC10942641; doi:10.7554/eLife.91826)
Supplement: Figure 3—source data 2. [file elife-91826-fig3-data2.xlsx]

## Sheet: Fig 3C
	Raw data for Figure 3C
	Donor chimerism in BM progenitors 24 weeks post-transplantation
	(% donor chimerism)
		EPCRhighCD48-/low					EPCRhighCD48+
	LSK	89.5271	83.159	86.3651	78.2387	78.1078	3.9486	9.7695	0.1135	1.7873	0.4094
	GMLP	86.403	78.7869	83.5281	73.9985	74.6699	3.8294	22.1248	0.3436	3.5996	0.8677
	MPP	91.7154	84.5921	88.641	78.6691	78.0201	5.7402	32.9646	0.2304	1.7528	0.1523
	CD150+CD48+	78.0488	77.3743	74.4027	77.5862	63	3.3333	3.1963	0.4	3.2	2.5862
	CD150+CD48low/-	91.7637	92.3128	91.1235	82.7221	87.9296	2.3155	0.305	0.0385	0.4239	0.2444
