# Supplementary material for: Ex vivo expansion potential of murine hematopoietic stem cells is a rare property only partially predicted by phenotype
Source: eLife. 2024 Mar 6;12:RP91826. doi: 10.7554/eLife.91826 (PMC10942641; doi:10.7554/eLife.91826)
Supplement: Figure 4—figure supplement 1—source data 1. [file elife-91826-fig4-figsupp1-data1.xlsx]

## Sheet: Fig 4 FS 1A
	Raw data for Figure 4 – figure supplement 1A
	Donor chimerism in PB lineages 16 weeks post-transplantation
	(% donor chimerism)
		BM EE10 + 2M					BM EE10 + 20M
	PB cells	22.36	60.059	51.384	82.716	6.583	8.352	44.148	17.838	54.472	18.457
	B cells	22.777	63.579	53.438	87.706	6.126	7.879	42.149	14.069	54.789	17.238
	T cells	23.211	48.11	45.368	69.77	8.69	11.448	53.914	29.204	57.826	22.895
	Myeloid cells	17.017	55.898	62.815	73.665	0.153	0.916	32.707	2.638	35.461	6.807
