# Supplementary material for: Ex vivo expansion potential of murine hematopoietic stem cells is a rare property only partially predicted by phenotype
Source: eLife. 2024 Mar 6;12:RP91826. doi: 10.7554/eLife.91826 (PMC10942641; doi:10.7554/eLife.91826)
Supplement: Figure 4—figure supplement 1—source data 2. [file elife-91826-fig4-figsupp1-data2.xlsx]

## Sheet: Fig 4 FS 1B
	Raw data for Figure 4 – figure supplement 1B
	Donor chimerism in BM HSCs 16 weeks post-transplantation
	(% donor chimerism)
	BM EE10 + 2M	BM EE10 + 20M
	37.2414	10.0304
	78.6096	28.5714
	77.4725	1.8382
	51.8072	18.2482
	1.8868	12.1387
