# Supplementary material for: Ex vivo expansion potential of murine hematopoietic stem cells is a rare property only partially predicted by phenotype
Source: eLife. 2024 Mar 6;12:RP91826. doi: 10.7554/eLife.91826 (PMC10942641; doi:10.7554/eLife.91826)
Supplement: Figure 4—figure supplement 1—source data 3. [file elife-91826-fig4-figsupp1-data3.xlsx]

## Sheet: Fig 4 FS 1D
	Raw data for Figure 4 – figure supplement 1D
	Whole culture cellularity and frequency and fold change of phenotypic cHSCs expanded ex vivo from BM- or FL-HSCs
	Cellularity of whole culture			cHSC frequency			cHSC fold change
	(x105 cells)			(% of viable cells)
	BM HSCs	FL HSCs		BM HSCs	FL HSCs		BM HSCs	FL HSCs
	209.72	265		0.0903	0.0237		378.6	125.39
	270.48	377.5		0.069	0.0285		373.53	215.41
	224	311.5		0.1748	0.0275		783.32	171.42
	296.82	312.5		0.0666	0.043		395.17	268.5
	197.96	221		0.1109	0.0341		439	150.9
	240	301.5		0.2243	0.0216		1076.44	130.45
	242.4	288		0.0348	0.0304		168.89	174.88
	223.44	329.5		0.0933	0.0404		417.07	266.26
