# Supplementary material for: Ex vivo expansion potential of murine hematopoietic stem cells is a rare property only partially predicted by phenotype
Source: eLife. 2024 Mar 6;12:RP91826. doi: 10.7554/eLife.91826 (PMC10942641; doi:10.7554/eLife.91826)
Supplement: Figure 4—figure supplement 1—source data 4. [file elife-91826-fig4-figsupp1-data4.xlsx]

## Sheet: Fig 4 FS 1E
	Raw data for Figure 4 – figure supplement 1E
	Donor chimerism in PB lineages 16 weeks post-transplantation
	(% donor chimerism)
		FL EE10 + 2M					FL EE10 + 20M
	PB cells	75.579	74.577	78.062	66.82	78.108	43.729	43.886	43.014	35.56	37.7
	B cells	71.636	70.719	74.265	62.09	74.931	35.492	34.98	34.927	30.4	31.267
	T cells	84.033	85.718	86.672	87.112	86.875	71.699	67.663	65.991	66.142	63.482
	Myeloid cells	82.703	74.116	82.425	64.753	78.771	42.762	42.377	44.936	45.532	36.665
