# Supplementary material for: Ex vivo expansion potential of murine hematopoietic stem cells is a rare property only partially predicted by phenotype
Source: eLife. 2024 Mar 6;12:RP91826. doi: 10.7554/eLife.91826 (PMC10942641; doi:10.7554/eLife.91826)
Supplement: Figure 4—figure supplement 1—source data 5. [file elife-91826-fig4-figsupp1-data5.xlsx]

## Sheet: Fig 4 FS 1F
	Raw data for Figure 4 – figure supplement 1F
	Donor chimerism in BM HSCs 16 weeks post-transplantation
	(% donor chimerism)
	BM-HSCs	FL-HSCs
	70.879	15.663
	80.435	20.513
	86.667	47.619
	90.345	32.203
	84.821	52.5
