# Supplementary material for: Ex vivo expansion potential of murine hematopoietic stem cells is a rare property only partially predicted by phenotype
Source: eLife. 2024 Mar 6;12:RP91826. doi: 10.7554/eLife.91826 (PMC10942641; doi:10.7554/eLife.91826)
Supplement: Figure 4—figure supplement 1—source data 6. [file elife-91826-fig4-figsupp1-data6.xlsx]

## Sheet: Fig 4 FS 1G
	Raw data for Figure 4 – figure supplement 1G
	RUs per initial HSCs in PB myeloid cells and BM HSCs
	(1 RU = 105 WBM cells)
		PB myeloid cells				BM HSCs
		Fresh BM HSCs	Cultured BM-HSCs	Cultured FL-HSCs		Fresh BM HSCs	Cultured BM-HSCs	Cultured FL-HSCs
		0.00037	6.24691	0.70833		4.47e-05	58.332	9.56294
		0.33211	8.34286	0.74074		0.229541	51.5974	5.72687
		0.413794	12.4828	1.26452		0.092408	24.7511	9.37995
		0.628302	16.5	2.05825		0.032684	38.3644	3.67422
		0.075248	7.89091	2.86275		0.27724	42.6118	7.42098
		0.038186				0.024199
		0.23978				0.004173
		0.038868				0.039995
		0.112212				0.244041
		0.61579				0.985446
		0.119602				0.613077
		0.026868				0.291241
		0.02199				0.050642
		1.35181				0.110762
		0.463334				0.033238
