# Supplementary material for: Ex vivo expansion potential of murine hematopoietic stem cells is a rare property only partially predicted by phenotype
Source: eLife. 2024 Mar 6;12:RP91826. doi: 10.7554/eLife.91826 (PMC10942641; doi:10.7554/eLife.91826)
Supplement: Figure 4—source data 1. [file elife-91826-fig4-data1.xlsx]

## Sheet: Fig 4B
	Raw data for Figure 4B
	Donor chimerism in PB lineages 16 weeks post-transplantation
	(% donor chimerism)
		Individual					Pooled
	PB cells	22.36	60.059	51.384	82.716	6.583	83.523	84.599	81.309	83.478	82.217
	B cells	22.777	63.579	53.438	87.706	6.126	79.662	80.801	77.331	77.828	76.444
	T cells	23.211	48.11	45.368	69.77	8.69	89.661	85.668	83.726	88.19	86.432
	Myeloid cells	17.017	55.898	62.815	73.665	0.153	96.685	96.268	92.524	95.045	95.517
