# Supplementary material for: Ex vivo expansion potential of murine hematopoietic stem cells is a rare property only partially predicted by phenotype
Source: eLife. 2024 Mar 6;12:RP91826. doi: 10.7554/eLife.91826 (PMC10942641; doi:10.7554/eLife.91826)
Supplement: Figure 4—source data 2. [file elife-91826-fig4-data2.xlsx]

## Sheet: Fig 4C
	Raw data for Figure 4C
	Donor chimerism in BM HSCs 16 weeks post-transplantation
	(% donor chimerism)
	Individual	Pooled
	37.2414	70.879
	78.6096	80.435
	77.4725	86.667
	51.8072	90.345
	1.8868	84.821
