# Supplementary material for: Ex vivo expansion potential of murine hematopoietic stem cells is a rare property only partially predicted by phenotype
Source: eLife. 2024 Mar 6;12:RP91826. doi: 10.7554/eLife.91826 (PMC10942641; doi:10.7554/eLife.91826)
Supplement: Figure 4—source data 3. [file elife-91826-fig4-data3.xlsx]

## Sheet: Fig 4E
	Raw data for Figure 4E
	Clone sizes of unique barcodes in ‘parental’ recipients and their appearance in ‘daughter’ recipients
		Apperance in # of daughter recipients
		0	1	2	3	4	5
	Clone size in parental recipients (%)	2.726	7.335	2.114	5.23	13.916	8.364
		1.685	6.264	1.866	3.663	8.188	5.788
		0.802	1.558	1.813	1.321	6.574	19.981
		0.385	1.103	1.124	0.8	4.474	16.234
		0.239	0.925	0.22	0.575	3.285	12.788
		0.234	0.443	0.19	0.396	1.4	10.866
		0.211	0.378	0.174	0.199	0.575	5.353
		0.176	0.28	1.303	4.365	0.134	2.71
		0.148	0.246	0.91	3.97	4.299	1.294
		0.146	0.234	0.891	1.742	0.552	1.137
		0.144	0.213	0.339	1.7	0.363	0.634
		0.141	0.181	0.308	0.976	25.952	14.073
		0.139	0.176	0.199	0.721	2.648	12.967
		0.139	0.167	0.182	0.49	1.891	11.149
		0.127	0.158	0.149	0.477	0.98	3.889
		0.125	0.151	0.367	0.407	0.11	14.519
		0.121	0.526	0.192	0.373	11.234	8.705
		0.116	0.363	2.521	0.354	4.973	8.368
		0.463	0.259	1.678	0.206	2.823	5.71
		0.367	0.195	0.605	0.182	2.535	5.448
		0.365	0.149	0.601	4.029	0.722	2.883
		0.327	0.601	0.454	3.515	0.551	2.895
		0.269	0.539	0.445	3.497	0.547
		0.259	0.38	0.307	3.414	0.479
		0.389	0.286	0.226	3.275	0.167
		0.283	0.211	0.14	2.016	16.707
		0.279	0.858	0.122	1.144	0.667
		0.272	0.669	0.112	0.8	0.254
		0.269	0.242	9.158	0.226
		0.131	0.214	3.381	0.112
		1.262	0.154	2.013	0.112
		0.894	0.139	1.743	9.902
		0.509	0.128	1.044	2.908
		0.401	4.568	0.302	2.355
		0.393	3.067	0.257	0.351
		0.392	1.587	0.257	0.331
		0.17	1.298	0.229	0.231
		3.511	0.87	0.2	0.195
		3.086	0.521		0.165
		0.8	0.378		0.139
		0.752	0.298		0.125
		0.727			22.98
		0.508			12.377
		0.505			1.648
		0.229			0.276
		0.225			0.251
		0.203			0.229
