# Supplementary material for: Ex vivo expansion potential of murine hematopoietic stem cells is a rare property only partially predicted by phenotype
Source: eLife. 2024 Mar 6;12:RP91826. doi: 10.7554/eLife.91826 (PMC10942641; doi:10.7554/eLife.91826)
Supplement: Figure 4—source data 4. [file elife-91826-fig4-data4.xlsx]

## Sheet: Fig 4F
	Raw data for Figure 4F
	Clone sizes of unique barcodes detected in BM myeloid cells of ‘parental’ recipients and their corresponding contribution in ‘daughter’ recipients
			Average clone size in daughter recipients (RPM)
	Clone size in parental recipients (%)	13.916	188779
		8.364	112238
		8.188	18412
		7.335	61093
		6.574	85742
		6.264	109226
		5.788	34464
		5.23	88592
		4.474	74246
		3.663	40310
		3.285	34168
		2.726	0
		2.114	80798
		1.866	3259
		1.813	60095
		1.685	0
		1.558	23745
		1.4	12533
		1.321	81700
		1.124	74505
		1.103	6453
		0.925	61835
		0.802	0
		0.8	41371
		0.575	57279
		0.575	3707
		0.443	1076
		0.396	23530
		0.385	0
		0.378	14579
		0.28	10366
		0.246	4183
		0.239	0
		0.234	1434
		0.234	0
		0.22	66655
		0.213	2032
		0.211	0
		0.199	18694
		0.19	4958
		0.181	18164
		0.176	2749
		0.176	0
		0.174	9174
		0.167	1195
		0.158	3227
		0.151	23303
		0.148	0
		0.146	0
		0.144	0
		0.141	0
		0.139	0
		0.139	0
		0.134	136149
		0.127	0
		0.125	0
		0.121	0
		0.116	0
		19.981	108827
		16.234	56014
		12.788	75923
		10.866	220526
		5.353	67017
		4.365	15547
		4.299	9638
		3.97	25739
		2.71	31133
		1.742	22597
		1.7	8456
		1.303	13910
		1.294	165003
		1.137	43154
		0.976	24957
		0.91	9528
		0.891	3649
		0.721	3380
		0.634	8120
		0.552	9907
		0.526	4776
		0.49	37643
		0.477	27126
		0.463	0
		0.407	45692
		0.373	7689
		0.367	0
		0.365	0
		0.363	36843
		0.363	33581
		0.354	9222
		0.339	1160
		0.327	0
		0.308	8340
		0.269	0
		0.259	1362
		0.259	0
		0.206	15995
		0.199	4612
		0.195	12054
		0.182	2574
		0.182	2108
		0.149	5282
		0.149	7070
		25.952	173121
		14.073	197622
		12.967	77946
		11.149	182953
		4.029	25258
		3.889	34407
		3.515	24212
		3.497	63342
		3.414	68605
		3.275	19769
		2.648	107890
		2.016	7369
		1.891	5864
		1.144	32223
		0.98	23653
		0.8	42674
		0.601	6522
		0.539	4020
		0.389	0
		0.38	10452
		0.367	29856
		0.286	2770
		0.283	0
		0.279	0
		0.272	0
		0.269	0
		0.226	4841
		0.211	299026
		0.192	5681
		0.131	0
		0.112	3875
		0.112	4970
		0.11	1992
		14.519	131109
		11.234	50129
		9.902	19527
		8.705	117662
		8.368	47877
		5.71	22834
		5.448	87310
		4.973	77355
		2.908	39912
		2.883	28854
		2.823	77620
		2.535	72455
		2.521	34923
		2.355	58779
		1.678	6854
		1.262	0
		0.894	0
		0.858	16141
		0.722	20161
		0.669	762
		0.605	60437
		0.601	18178
		0.551	9021
		0.547	9640
		0.509	0
		0.479	8591
		0.454	19981
		0.445	30933
		0.401	0
		0.393	0
		0.392	0
		0.351	32737
		0.331	68054
		0.307	63015
		0.242	3051
		0.231	18249
		0.226	1941
		0.214	5473
		0.195	27916
		0.17	0
		0.167	6112
		0.165	38535
		0.154	3741
		0.14	4671
		0.139	2188
		0.139	7804
		0.128	7212
		0.125	12719
		0.122	5760
		0.112	2010
		22.98	77092
		16.707	203867
		12.377	56481
		9.158	120208
		4.568	12739
		3.511	0
		3.381	319371
		3.086	0
		3.067	4433
		2.895	65061
		2.013	90330
		1.743	38083
		1.648	20360
		1.587	206560
		1.298	64604
		1.044	58514
		0.87	129433
		0.8	0
		0.752	0
		0.727	0
		0.667	30812
		0.521	134669
		0.508	0
		0.505	0
		0.378	18992
		0.302	9931
		0.298	47997
		0.276	83027
		0.257	9623
		0.257	18903
		0.254	232510
		0.251	9429
		0.229	0
		0.229	17941
		0.229	22243
		0.225	0
		0.203	0
		0.2	9556
