# Supplementary material for: Ex vivo expansion potential of murine hematopoietic stem cells is a rare property only partially predicted by phenotype
Source: eLife. 2024 Mar 6;12:RP91826. doi: 10.7554/eLife.91826 (PMC10942641; doi:10.7554/eLife.91826)
Supplement: Figure 4—source data 5. [file elife-91826-fig4-data5.xlsx]

## Sheet: Fig 4G
	Raw data for Figure 4G
	Clone size distribution of pre- and post-culture barcodes
	(%)
	Pre-culture	Post-culture
	13.916	4.726
	8.364	3.795
	8.188	3.268
	7.335	2.774
	6.574	2.519
	6.264	2.174
	5.788	1.799
	5.23	1.727
	4.474	1.527
	3.663	1.494
	3.285	1.443
	2.726	1.36
	2.114	1.298
	1.866	1.247
	1.813	1.203
	1.685	1.185
	1.558	1.185
	1.4	1.178
	1.321	1.112
	1.124	1.018
	1.103	1.003
	0.925	1
	0.802	0.971
	0.8	0.956
	0.575	0.945
	0.575	0.927
	0.443	0.905
	0.396	0.887
	0.385	0.883
	0.378	0.847
	0.28	0.836
	0.246	0.825
	0.239	0.825
	0.234	0.774
	0.234	0.771
	0.22	0.76
	0.213	0.727
	0.211	0.716
	0.199	0.705
	0.19	0.702
	0.181	0.68
	0.176	0.662
	0.176	0.629
	0.174	0.611
	0.167	0.589
	0.158	0.585
	0.151	0.553
	0.148	0.545
	0.146	0.545
	0.144	0.542
	0.141	0.516
	0.139	0.491
	0.139	0.487
	0.134	0.473
	0.127	0.473
	0.125	0.465
	0.121	0.462
	0.116	0.458
	19.981	0.458
	16.234	0.443
	12.788	0.443
	10.866	0.436
	5.353	0.436
	4.365	0.436
	4.299	0.433
	3.97	0.429
	2.71	0.425
	1.742	0.422
	1.7	0.422
	1.303	0.418
	1.294	0.411
	1.137	0.411
	0.976	0.407
	0.91	0.407
	0.891	0.404
	0.721	0.389
	0.634	0.378
	0.552	0.371
	0.526	0.367
	0.49	0.356
	0.477	0.349
	0.463	0.338
	0.407	0.327
	0.373	0.313
	0.367	0.313
	0.365	0.309
	0.363	0.305
	0.363	0.291
	0.354	0.287
	0.339	0.287
	0.327	0.284
	0.308	0.284
	0.269	0.28
	0.259	0.276
	0.259	0.273
	0.206	0.269
	0.199	0.262
	0.195	0.262
	0.182	0.258
	0.182	0.254
	0.149	0.254
	0.149	0.247
	25.952	0.244
	14.073	0.236
	12.967	0.236
	11.149	0.229
	4.029	0.225
	3.889	0.222
	3.515	0.218
	3.497	0.214
	3.414	0.214
	3.275	0.204
	2.648	0.204
	2.016	0.204
	1.891	0.2
	1.144	0.196
	0.98	0.196
	0.8	0.193
	0.601	0.189
	0.539	0.189
	0.389	0.189
	0.38	0.185
	0.367	0.182
	0.286	0.178
	0.283	0.178
	0.279	0.178
	0.272	0.174
	0.269	0.174
	0.226	0.171
	0.211	0.171
	0.192	0.171
	0.131	0.171
	0.112	0.167
	0.112	0.164
	0.11	0.164
	14.519	0.164
	11.234	0.164
	9.902	0.16
	8.705	0.156
	8.368	0.153
	5.71	0.145
	5.448	0.145
	4.973	0.142
	2.908	0.142
	2.883	0.142
	2.823	0.138
	2.535	0.135
	2.521	0.135
	2.355	0.135
	1.678	0.135
	1.262	0.131
	0.894	0.131
	0.858	0.127
	0.722	0.127
	0.669	0.124
	0.605	0.12
	0.601	0.12
	0.551	0.12
	0.547	0.116
	0.509	0.116
	0.479	0.113
	0.454	0.113
	0.445	0.113
	0.401	20.715
	0.393	4.103
	0.392	2.224
	0.351	1.991
	0.331	1.801
	0.307	1.785
	0.242	1.765
	0.231	1.745
	0.226	1.656
	0.214	1.473
	0.195	1.41
	0.17	1.349
	0.167	1.331
	0.165	1.291
	0.154	1.245
	0.14	1.225
	0.139	1.088
	0.139	1.08
	0.128	1.063
	0.125	1.045
	0.122	1.04
	0.112	1.004
	22.98	0.997
	16.707	0.928
	12.377	0.916
	9.158	0.913
	4.568	0.91
	3.511	0.855
	3.381	0.834
	3.086	0.822
	3.067	0.73
	2.895	0.71
	2.013	0.7
	1.743	0.672
	1.648	0.652
	1.587	0.634
	1.298	0.578
	1.044	0.576
	0.87	0.576
	0.8	0.558
	0.752	0.558
	0.727	0.555
	0.667	0.538
	0.521	0.517
	0.508	0.517
	0.505	0.5
	0.378	0.492
	0.302	0.467
	0.298	0.462
	0.276	0.449
	0.257	0.439
	0.257	0.439
	0.254	0.434
	0.251	0.416
	0.229	0.401
	0.229	0.401
	0.229	0.396
	0.225	0.383
	0.203	0.368
	0.2	0.363
		0.36
		0.355
		0.355
		0.34
		0.335
		0.332
		0.317
		0.314
		0.297
		0.294
		0.294
		0.289
		0.287
		0.261
		0.261
		0.256
		0.256
		0.249
		0.249
		0.249
		0.246
		0.243
		0.241
		0.241
		0.231
		0.228
		0.218
		0.218
		0.216
		0.208
		0.208
		0.203
		0.198
		0.198
		0.195
		0.195
		0.195
		0.193
		0.193
		0.19
		0.188
		0.188
		0.185
		0.178
		0.175
		0.17
		0.17
		0.167
		0.167
		0.162
		0.16
		0.155
		0.155
		0.147
		0.147
		0.145
		0.142
		0.139
		0.139
		0.134
		0.132
		0.132
		0.132
		0.132
		0.132
		0.127
		0.127
		0.124
		0.124
		0.124
		0.122
		0.119
		0.119
		0.119
		0.117
		0.114
		0.114
		0.114
		7.171
		6.638
		4.758
		3.855
		3.332
		2.453
		2.262
		2.2
		2.172
		2.155
		1.84
		1.767
		1.48
		1.461
		1.421
		1.3
		1.236
		1.151
		1.127
		1.106
		1.075
		1.073
		1.04
		1.033
		1.033
		0.935
		0.909
		0.902
		0.9
		0.893
		0.867
		0.841
		0.838
		0.836
		0.815
		0.782
		0.727
		0.71
		0.682
		0.654
		0.63
		0.583
		0.545
		0.523
		0.523
		0.512
		0.509
		0.495
		0.481
		0.478
		0.462
		0.452
		0.445
		0.436
		0.429
		0.424
		0.414
		0.407
		0.391
		0.388
		0.381
		0.353
		0.341
		0.334
		0.32
		0.313
		0.301
		0.296
		0.287
		0.287
		0.287
		0.279
		0.272
		0.272
		0.265
		0.265
		0.263
		0.261
		0.258
		0.253
		0.249
		0.246
		0.244
		0.239
		0.239
		0.237
		0.234
		0.23
		0.227
		0.227
		0.223
		0.216
		0.211
		0.201
		0.197
		0.194
		0.192
		0.189
		0.187
		0.187
		0.187
		0.185
		0.173
		0.161
		0.159
		0.159
		0.156
		0.154
		0.154
		0.152
		0.149
		0.149
		0.149
		0.147
		0.147
		0.144
		0.144
		0.142
		0.133
		0.133
		0.13
		0.128
		0.128
		0.126
		0.126
		0.126
		0.123
		0.123
		0.121
		0.118
		0.118
		0.116
		5.548
		4.3
		4.3
		3.619
		3.185
		2.668
		2.551
		2.507
		2.497
		2.154
		2.125
		2.02
		1.962
		1.683
		1.485
		1.404
		1.332
		1.311
		1.029
		0.934
		0.929
		0.925
		0.865
		0.865
		0.865
		0.865
		0.849
		0.808
		0.758
		0.706
		0.682
		0.651
		0.649
		0.632
		0.609
		0.605
		0.603
		0.593
		0.57
		0.568
		0.566
		0.564
		0.547
		0.529
		0.514
		0.498
		0.494
		0.49
		0.483
		0.479
		0.475
		0.473
		0.465
		0.458
		0.458
		0.452
		0.444
		0.442
		0.415
		0.415
		0.413
		0.411
		0.405
		0.403
		0.386
		0.376
		0.376
		0.368
		0.368
		0.364
		0.361
		0.355
		0.347
		0.328
		0.3
		0.295
		0.295
		0.289
		0.275
		0.275
		0.26
		0.25
		0.244
		0.244
		0.24
		0.238
		0.229
		0.229
		0.227
		0.227
		0.217
		0.217
		0.215
		0.215
		0.215
		0.213
		0.205
		0.204
		0.204
		0.202
		0.2
		0.198
		0.192
		0.182
		0.18
		0.18
		0.178
		0.178
		0.176
		0.176
		0.173
		0.171
		0.161
		0.161
		0.157
		0.153
		0.147
		0.145
		0.142
		0.142
		0.138
		0.134
		0.132
		0.132
		0.132
		0.132
		0.13
		0.128
		0.126
		0.124
		0.124
		0.122
		0.12
		0.118
		0.116
		0.116
		0.116
		0.116
		0.116
		0.116
