# Supplementary material for: Ex vivo expansion potential of murine hematopoietic stem cells is a rare property only partially predicted by phenotype
Source: eLife. 2024 Mar 6;12:RP91826. doi: 10.7554/eLife.91826 (PMC10942641; doi:10.7554/eLife.91826)
Supplement: Figure 4—source data 6. [file elife-91826-fig4-data6.xlsx]

## Sheet: Fig 4H
	Raw data for Figure 4H
	Frequency distribution of pre- and post-culture barcodes
			% of unique barcodes
			Pre-culture	Post-culture
	Clone size in each recipient (%)	0.1 - 1%	68.16	87.76
		1 - 5%	21.08	11.71
		> 5%	10.76	0.52
