# Supplementary material for: Ex vivo expansion potential of murine hematopoietic stem cells is a rare property only partially predicted by phenotype
Source: eLife. 2024 Mar 6;12:RP91826. doi: 10.7554/eLife.91826 (PMC10942641; doi:10.7554/eLife.91826)
Supplement: Figure 5—figure supplement 1—source data 1. [file elife-91826-fig5-figsupp1-data1.xlsx]

## Sheet: Fig 5 FS 1B
	Raw data for Figure 5 – figure supplement 1B
	Donor chimerism in PB lineages 16 weeks post-transplantation
	(% donor chimerism)
		Irradiated					Unconidtioned
	PB cells	90.984	89.373	92.772	91.122	92.664	0.044	0.083	1.954	0.066	0.231
	B cells	89.276	86.278	90.754	89.496	90.67	0.038	0.076	0.376	0.06	0.088
	T cells	89.533	89.226	92.378	89.758	90.348	0.06	0.154	3.766	0.125	0.674
	Myeloid cells	97.985	96.792	99.167	98.122	99.381	0	0	5.302	0.006	0
