# Supplementary material for: Ex vivo expansion potential of murine hematopoietic stem cells is a rare property only partially predicted by phenotype
Source: eLife. 2024 Mar 6;12:RP91826. doi: 10.7554/eLife.91826 (PMC10942641; doi:10.7554/eLife.91826)
Supplement: Figure 5—figure supplement 1—source data 2. [file elife-91826-fig5-figsupp1-data2.xlsx]

## Sheet: Fig 5 FS 1G
	Raw data for Figure 5 – figure supplement 1G
	Number of undivided donor EPCR(high) HSCs without division
	(x 103 cells)
		Control		EE100
	2 weeks	741	769	14066	12259
	4 weeks	69	145	3972	3704
	6 weeks	665	553	2635	3654
	8 weeks	519		2744
