# Supplementary material for: Ex vivo expansion potential of murine hematopoietic stem cells is a rare property only partially predicted by phenotype
Source: eLife. 2024 Mar 6;12:RP91826. doi: 10.7554/eLife.91826 (PMC10942641; doi:10.7554/eLife.91826)
Supplement: Figure 5—source data 1. [file elife-91826-fig5-data1.xlsx]

## Sheet: Fig 5B
	Raw data for Figure 5B
	Donor chimerism in PB lineages 24 weeks post-transplantation
	(% donor chimerism)
		CD45.2+ recipients					CD45.1+/CD45.2+ recipients
	PB cells	0.187	0.081	0.041	0.027	0.091	3.005	2.116	1.297	2.209	1.484
	B cells	0.128	0.095	0.004	0.036	0.119	0.721	0.857	0.401	0.793	0.396
	T cells	0.444	0.104	0.148	0.043	0.122	4.723	3.741	2.275	3.224	2.45
	Myeloid cells	0	0	0	0	0	4.929	3.974	2.623	3.697	3.007
