# Supplementary material for: Ex vivo expansion potential of murine hematopoietic stem cells is a rare property only partially predicted by phenotype
Source: eLife. 2024 Mar 6;12:RP91826. doi: 10.7554/eLife.91826 (PMC10942641; doi:10.7554/eLife.91826)
Supplement: Figure 5—source data 2. [file elife-91826-fig5-data2.xlsx]

## Sheet: Fig 5D
	Raw data for Figure 5D
	Donor chimerism in BM EPCR+ HSCs over 8 weeks post-transplantation
	(% donor chimerism)
		Control		EE100
	2 weeks	5.7	4.21	29.8	19
	4 weeks	8.64	9.46	6.97	10.3
	6 weeks	8.44	9.11	9.78	11.5
	8 weeks	6.43		6.48
