# Supplementary material for: Ex vivo expansion potential of murine hematopoietic stem cells is a rare property only partially predicted by phenotype
Source: eLife. 2024 Mar 6;12:RP91826. doi: 10.7554/eLife.91826 (PMC10942641; doi:10.7554/eLife.91826)
Supplement: Figure 5—source data 3. [file elife-91826-fig5-data3.xlsx]

## Sheet: Fig 5F
	Raw data for Figure 5F
	Cell divisions of donor BM EPCR+ HSCs
	(% of donor EPCR+ HSCs)
		0 division						1 division
			Control		EE100				Control		EE100
		2 weeks	17.3	15.3	28.5	29.3		2 weeks	51.5	42.3	39.1	40
		4 weeks	1.23	0.76	17	16.1		4 weeks	11.8	11.3	19.9	23.6
		6 weeks	3.67	1.76	7.71	12.3		6 weeks	9.05	6.05	14	15.5
		8 weeks	1.57		12.1			8 weeks	5.5		10.9
		2 divisions						>2 divisions
			Control		EE100				Control		EE100
		2 weeks	25.5	33.8	23.4	21.1		2 weeks	5.63	8.11	5.56	5.929
		4 weeks	30.3	27.5	28.2	22.8		4 weeks	56.64	60.38	34.72	37.07
		6 weeks	24	22.4	20.6	23.1		6 weeks	63.3	69.83	56.57	48.61
		8 weeks	10.2		12.7			8 weeks	73.3		56.6
